# Supplementary material
Source: HighWire-hosted journal article supplement (https://thorax.bmj.com/content/thoraxjnl-2017-210294)
Supplement: inline-supplementary-material-1 [file inline-supplementary-material-1.pdf]

## Online supplement

### Smoking, telomere length and lung function decline: a longitudinal population-based study

Pascal Andujar<sup>1,3</sup>, Dominique Courbon<sup>4,5</sup>, Emilie Bizard<sup>2</sup>, Elisabeth Marcos<sup>2</sup>, Serge Adnot<sup>1,2,6</sup>, Laurent Boyer<sup>1,2,6</sup>, Pascal Demoly<sup>7,8</sup>, Debbie Jarvis<sup>9,10</sup>, Catherine Neukirch<sup>4,11</sup>, Isabelle Pin<sup>12,13,14</sup>, Gabriel Thabut<sup>4,5,15</sup>, Jorge Boczkowski<sup>1,2,6</sup>, Bénédicte Leynaert<sup>4,5</sup>.

<sup>1</sup>Université Paris Est-Créteil, Faculté de Médecine, Créteil, France

<sup>2</sup>INSERM, U955, DHU ATV-B, Créteil, France

<sup>3</sup>CHI Créteil, Service de Pneumologie et Pathologie Professionnelle, Créteil, France

<sup>4</sup>INSERM, UMR1152, Paris, France.

<sup>5</sup>Université Paris-Diderot, DHU FIRE, Paris, France

<sup>6</sup>CHU Mondor, Créteil, France

<sup>7</sup>Department of Pulmonology, Division of Allergy, Hôpital Arnaud de Villeneuve, University Hospital of Montpellier, Montpellier, France;

<sup>8</sup>Inserm, UMR-S 1136, UPMC, Université Paris 06, UMRS 1136, Equipe - EPAR - IPLESP, Sorbonne Universités, Paris, France.

<sup>9</sup>Population Health and Occupational Disease, National Heart and Lung Institute, Imperial College, London

<sup>10</sup>MRC-PHE Centre for Environment and Health, Imperial College London

<sup>11</sup>CHU Bichat, Service de Pneumologie A, Paris, France

<sup>12</sup>Université Grenoble-Alpes, Grenoble, France

<sup>13</sup>INSERM, U823, Grenoble, France

<sup>14</sup>CHU Grenoble-Alpes, Service de Pédiatrie, Grenoble, France

<sup>15</sup>CHU Bichat, Service de Pneumologie B, Paris, France.

## Financial sources

This analysis is using health data collected following standardized protocols implemented through the European Community Respiratory Health Survey II and III. The coordination of ECRHS was supported by the European Commission. **Financial support for ECRHS I - France:** The following grants helped to fund the local studies. Ministère de la Santé, Glaxo France, Institut Pneumologique d'Aquitaine, Contrat de Plan Etat-Région Languedoc-Roussillon, CNMATS, CNMRT (90MR/10, 91AF/6), Ministre délégué de la santé, RNSP, France; **Financial Support for ECRHS II - France:** **(All)** Programme Hospitalier de Recherche Clinique-Direction de la Recherche Clinique (DRC) de Grenoble 2000 number 2610, Ministry of Health, Ministère de l'Emploi et de la Solidarité, Direction

Générale de la Santé, Centre Hospitalier Universitaire (CHU) de Grenoble, **Grenoble:** Comité des Maladies Respiratoires de l'Isère; **Montpellier:** Aventis ( France), Direction Régionale des Affaires Sanitaires et Sociales Languedoc-Roussillon; **Paris:** Union Chimique Belge- Pharma (France), Aventis (France), Glaxo France ; **Financial Support for ECRHS III - France: (All)** Ministère de la Santé. Programme Hospitalier de Recherche Clinique (PHRC) national 2010 ; **Grenoble:** Comité Scientifique AGIRadom 2011; **Paris:** Agence Nationale de la Recherche, Région Ile de France, domaine d'intérêt majeur (DIM)

### **Acknowledgments**

ECRHS I: The co-ordination of ECRHS I was supported by the European Commission and the authors and participants are grateful to the late C. Baya and M. Hallen for their help during the study and K. Vuylsteek and the members of the COMAC for their support. Coordinating Centre (London): P. Burney, S. Chinn, C. Luczynska†, D. Jarvis, E. Lai. Project Management Group: P. Burney (Project leader-UK) S. Chinn (UK), C Luczynska † (UK), D. Jarvis (UK), P. Vermeire † (Antwerp), H. Kesteloot (Leuven), J. Bousquet (Montpellier), D Nowak (Hamburg), the late J. Prichard † (Dublin), R. de Marco (Verona), B. Rijcken (Groningen), JM. Anto (Barcelona), J. Alves (Oporto), G. Boman (Uppsala), N. Nielsen (Copenhagen), P. Paoletti (Pisa). The Steering Committee for the ECRHS II were as follows: U. Ackermann-Lieblich (University of Basel, Switzerland); N. Kuenzli (University of Basel, and University of Southern California, Los Angeles, USA); J.M. Antó and J. Sunyer (Institut Municipal d'Investigació Mèdica (IMIM-IMAS), Universitat Pompeu Fabra (UPF), Spain); P. Burney (project leader), S. Chinn, D. Jarvis, J. Knox and C. Luczynska (King's College London, UK); I. Cerveri (University of Pavia, Italy); R. de Marco (University of Verona, Italy); T. Gislason (Iceland University Hospital, Iceland); J. Heinrich and M. Wjst (GSF-Institute of Epidemiology, Germany); C. Janson (Uppsala University, Sweden); B. Leynaert and F. Neukirch (Institut National de la Santé et de la Recherche Médicale (INSERM),France); J. Schouten (University of Groningen, The Netherlands); C. Svanes (University of Bergen, Norway); P. Vermeire (University of Antwerp, Belgium). ECRHS II Principal Investigators and senior scientific teams: France: Paris (F. Neukirch, B. Leynaert, R. Liard, M. Zureik), Grenoble (I. Pin, J. Ferran-Quentin), Montpellier (J. Bousquet, P.J. Bousquet). ECRHS III Principal Investigators and senior scientific teams: France: Grenoble (I. Pin, V. Siroux, J. Ferran, J.L. Cracowski); Montpellier (P. Demoly, A. Bourdin, I. Vachier); Paris (B. Leynaert, D. Soussan, D. Courbon, C. Neukirch, L. Alavoine, X. Duval, I. Poirier).

### **Conflicts of interest**

All authors have indicated that they have no financial conflict of interest.

## **Authors contributions**

P.A.: Study design, interpretation of data, and manuscript writing.

J.B.: Idea of the study. Participation in the editing and correction of the final text.

D.C.: Study design, interpretation of data, statistical analysis and manuscript writing.

B.L.: Study design, interpretation of data, and manuscript writing and coordination of the ECRHS study and data collection in French centres.

I.P.: Coordination of the ECRHS study and data collection in French centres and participation in the editing and correction of the final text.

P.D.: Coordination of data collection in a French centre and participation in the editing and correction of the final text.

C.N.: Coordination of data collection in a French centre and participation in the editing and correction of the final text.

D.J.: Coordination of ECRHS international and participation in the editing and correction of the final text.

G.T.: Participation in the editing and correction of the final text.

E.M.: Biological analysis.

E. B.-P.: Biological analysis.

L.B. Biological analysis and participation in the editing and correction of the final text.

S.A.: Participation in the editing and correction of the final text.

All authors participated in the interpretation of the findings, reviewed the manuscript critically, and approved the final version.

## **Methods – *Study population and measurements***

The European Community Respiratory Health Survey (ECRHS) assessed lung function and lung function decline in adults from the general population. In addition to the core protocol, DNA from participants in ECRHS II in the centres of Paris, Grenoble and Montpellier was assayed to assess relative telomere length. The analysis was based on the follow-up data from these 3 French centres. The methods for ECRHS-France and spirometry in ECRHS have been described elsewhere (1, 2).

Briefly, between 1991 and 1993, each participating centre randomly selected 1500 men and 1500 women, representative of the age group 20-44 years, to answer a short postal screening questionnaire (ECRHS I). A random sample of respondents was invited to visit a local testing centre, to answer a more detailed administered questionnaire, provide a blood sample and undergo lung function assessment. Participants who completed the extended questionnaire were eligible for the follow-up surveys in 2000-2002 (ECRHS-II) and 2011-2013 (ECRHS-III), during which they answered extended questionnaires, provided a blood sample for IgE measurement and DNA extraction and again performed lung function assessment. Forced expiratory volume in 1 s (FEV1), and forced vital capacity (FVC) were measured with a water-sealed bell spirometer (Biomedin srl, Padova, Italy) in ECRHS II and with the portable ultrasonic EasyOne spirometer (ndd Medizintechnik, Switzerland) in ECRHS III. The maximum FEV1 and FVC were calculated from up to five technically acceptable blows in accordance with the American Thoracic Society criteria for reproducibility. Post-bronchodilator (BD) spirometry 15 minutes after administration of 200µg Salbutamol was performed only at ECRHS III. Total serum IgE and IgE specific to house dust mite, timothy grass, cat, and Cladosporium were measured centrally at Kings College London using the Pharmacia CAP system (Uppsala, Sweden).

Relative telomere length in peripheral leukocytes in participants in ECRHS II was measured by quantitative PCR using QuantStudio™ 6 Flex Real-Time PCR System (Applied Biosystems, Foster, CA), as described previously (3). Briefly, the telomere repeat copy number to single-gene copy number (T/S) ratio was determined using the comparative Ct method ( $T/S = 2^{-\Delta\Delta C_t}$ ), using 36B4 gene for normalization (acidic ribosomal phosphoprotein PO, a single-copy gene). Genomic DNAs from the 3 study centres were extracted centrally in Bichat Medical School from leukocytes in peripheral venous blood samples using the QIAamp blood kit (Qiagen, Courtaboeuf, France) according to the manufacturer's protocol, and quantified with a Nano Drop ND-1000 Spectrometer (Thermo Fischer Scientific, Wilmington, Delaware). Each sample was run in triplicate, using the SYBR green method (Invitrogen, Cergy-Pontoise, France). Triplicates merged into a final mean value that exhibited a standard deviation of the three Ct values smaller than 0.1.

The study was approved by the appropriate ethics committee, and informed written consent was obtained from every participant.

All individuals who had performed spirometry and with telomere length assessed in ECRHS II (referred to as 'baseline') were eligible for this analysis.

### **Methods – Definition of outcomes and covariates and statistical analysis**

Individuals with specific IgE values  $\geq 0.35$  kIU/L were considered as atopic. Current asthma was defined as a positive answer to the questions "Have you had an attack of asthma in the past 12 months?" or "Are you currently taking any medicines, including inhalers, aerosols, or tablets for asthma?". Smokers were categorized as "ex-smoker" if they had already stopped smoking at the previous survey (sustained quitters), whereas more recent quitters and current smokers were gathered as "smokers" and dichotomized according the cumulative number of pack years they had smoked at the time of the survey (ie cumulative pack-years smoked at baseline for the cross-sectional analysis at baseline, and cumulative pack-years smoked at the end of follow-up for the analysis of lung function at follow-up and lung function decline)1 . For the sensitivity analysis taking into the tobacco consumption over the follow-up rather than the cumulative tobacco history at the end of follow-up, only current smokers at the end of follow-up were considered as smokers, and subjects who quitted smoking between baseline and follow-up (N=45) were excluded from the analysis.

Predicted FEV1 and FVC values were calculated using the Global Lungs Initiative (GLI) reference equations (4). Airflow obstruction was defined either according the Global Initiative for Chronic Obstructive Lung Disease (GOLD) fixed cut-off (FEV1/FVC<0.70) or as FEV1/FVC<lower limit of normal (LLN) according to the GLI.

Absolute change in FEV1 (FEV1 decline) was expressed per year of follow-up, with ECRHS II considered as "baseline" (pre-bronchodilator ECRHS III value minus ECRHS II value - ie, a negative value represents decline). To account for possible bias related to change in spirometer between the surveys, the association between telomere length and lung function decline was assessed with (i) uncorrected FEV1 at follow-up, and in sensitivity analyses (ii) with FEV1 at follow-up corrected assuming a fixed additive correction term (obtained from Gerbase et al. in a quasi-experimental comparison of spirometers), and (iii) with FEV1 corrected using a correction term obtained from internally-derived spirometer-specific reference equations, integrating sex, age, height and spirometer type, as proposed by Bridevaux et al. (5). In another sensitivity analysis, change in FEV1 was expressed as change in FEV1%predicted, reconstructed for a period of 10 years: (FEV1%predicted (from Global Lungs Initiative (GLI) reference equations at ECRHS III minus FEV1%predicted at ECRHS II) divided by length of follow-up \* 10 years) (4).

The  $\chi^2$  test for qualitative variables or analysis of variance for continuous variables were used to analyse differences between groups. In addition, multiple linear regression analyses or logistic regressions were used, with lung function or airway obstruction as outcome and smoking group,

centre, gender, age, body mass index (BMI) and physical activity as covariates. We tested for possible interactions between smoking and age/gender/BMI/physical activity, but there was no suggestion for any modifying effect of these variables on the association between smoking and lung function decline. Tertile of relative telomere length at baseline (ECRHS II) (with the first tertile consisting of individuals with the shortest telomere lengths) was considered either as a covariate or to define strata for the stratified analyses. All analyses were performed on SAS 9.3 release (SAS Institute Inc.).

### **Results - Descriptive data of the study population**

Of the 584 participants with complete data for lung function and satisfying reproducibility criterion, relative telomere length at baseline, 448 (76.7%) participated in ECRHS-III and had lung function measured. The mean follow-up time was 11.1 years (SD 0.7; range 9.2-13.1). A comparison of baseline characteristics between participants and non-participants of the follow-up no significantly difference for smoking, age, sex ratio, body-mass index, physical activity, FEV1%predicted and telomere length. The baseline characteristics of the participants with follow-up data are shown in Table E1. At baseline, the participants (48.4% male) were aged 30 to 57 years (mean 45.7, standard deviation (SD) 6.8), 37.0% were current smokers, 7.6% had asthma (Table E1); 4.0% had airflow obstruction (pre-BD FEV1/FVC < LLN), and the mean FEV1%predicted was 99.1%% (SD 13.4) (Table E2).

The mean annual decline in FEV1 was 43.6 ml/year (SD27.6) in the total sample. It was 38.5 ml/year (SD27.5) after applying the fixed correction derived from the study by Gerbase et al. to take into account the change in spirometer between baseline and follow-up, and 30.4 ml/year (SD27.4) after applying the spirometer-specific individualized correction as proposed by Bridevaux et al. (5, 6).

### **References**

1. Chinn S, Jarvis D, Melotti R, Luczynska C, Ackermann-Liebrich U, Anto JM, Cerveri I, de Marco R, Gislason T, Heinrich J, Janson C, Kunzli N, Leynaert B, Neukirch F, Schouten J, Sunyer J, Svanes C, Vermeire P, Wjst M, Burney P. Smoking cessation, lung function, and weight gain: a follow-up study. *Lancet* 2005; 365: 1629-1635; discussion 1600-1621.

2. Guenegou A, Boczkowski J, Aubier M, Neukirch F, Leynaert B. Interaction between a heme oxygenase-1 gene promoter polymorphism and serum beta-carotene levels on 8-year lung function decline in a general population: the European Community Respiratory Health Survey (France). *Am J Epidemiol* 2008; 167: 139-144.
3. Savale L, Chaouat A, Bastuji-Garin S, Marcos E, Boyer L, Maitre B, Sarni M, Housset B, Weitzenblum E, Matrat M, Le Corvoisier P, Rideau D, Boczkowski J, Dubois-Rande JL, Chouaid C, Adnot S. Shortened telomeres in circulating leukocytes of patients with chronic obstructive pulmonary disease. *Am J Respir Crit Care Med* 2009; 179: 566-571.
4. Quanjer PH, Stanojevic S, Cole TJ, Baur X, Hall GL, Culver BH, Enright PL, Hankinson JL, Ip MS, Zheng J, Stocks J, Initiative ERSGLF. Multi-ethnic reference values for spirometry for the 3-95-yr age range: the global lung function 2012 equations. *Eur Respir J* 2012; 40: 1324-1343.
5. Bridevaux PO, Dupuis-Lozeron E, Schindler C, Keidel D, Gerbase MW, Probst-Hensch NM, Bettschart R, Burdet L, Pons M, Rothe T, Turk A, Stolz D, Tschopp JM, Kuenzli N, Rochat T. Spirometer Replacement and Serial Lung Function Measurements in Population Studies: Results From the SAPALDIA Study. *Am J Epidemiol* 2015; 181: 752-761.
6. Gerbase MW, Dupuis-Lozeron E, Schindler C, Keidel D, Bridevaux PO, Kriemler S, Probst-Hensch NM, Rochat T, Kunzli N. Agreement between spirometers: a challenge in the follow-up of patients and populations? *Respiration* 2013; 85: 505-514.

Online Table E1. Characteristics of the study population, by tertiles of telomere length

|                                        | Tertiles of telomere length at baseline |                                 |                   |                                |                 | p for trend† |
|----------------------------------------|-----------------------------------------|---------------------------------|-------------------|--------------------------------|-----------------|--------------|
|                                        | All<br>n=448                            | Tertile1<br>(shortest)<br>n=148 | Tertile2<br>n=147 | Tertile3<br>(longest)<br>n=153 |                 |              |
| <b>Characteristics at baseline*</b>    | n                                       | % or<br>mean±sd                 | % or<br>mean±sd   | % or<br>mean±sd                | % or<br>mean±sd |              |
| <b>Centre</b>                          |                                         |                                 |                   |                                |                 | 0.22         |
| Grenoble                               | 213                                     | 47.5                            | 44.6              | 53.1                           | 45.1            |              |
| Montpellier                            | 66                                      | 14.7                            | 16.9              | 15.6                           | 11.8            |              |
| Paris                                  | 169                                     | 37.7                            | 38.5              | 31.3                           | 43.1            |              |
| <b>Sex, male</b>                       | 217                                     | 48.4                            | 48.7              | 47.6                           | 49.0            | 0.95         |
| <b>Age, years</b>                      | 448                                     | 45.7±6.8                        | 47.7±6.1          | 45.3±7.1                       | 44.0±6.7        | <0.0001      |
| <b>Smoking status</b>                  |                                         |                                 |                   |                                |                 | 0.04         |
| Never smokers                          | 169                                     | 38.6                            | 33.8              | 45.1                           | 37.1            |              |
| Ex-smokers                             | 107                                     | 24.4                            | 31.7              | 16.9                           | 24.5            |              |
| Smokers ≤ 15 Pack-yrs                  | 81                                      | 18.5                            | 14.5              | 17.6                           | 23.2            |              |
| Smokers > 15 Pack-yrs                  | 81                                      | 18.5                            | 20.0              | 20.4                           | 15.2            |              |
| <b>Cumulative Pack-Years</b>           |                                         |                                 |                   |                                |                 |              |
| In total sample, Pack-yrs              | 438                                     | 10.5±15.                        | 11.2±14.6         | 9.9±13.9                       | 10.3±16.7       | p=0.63       |
| In Ex+Smokers, Pack-yrs                | 269                                     | 17.1±16.                        | 16.9±15.0         | 18.1±14.3                      | 16.4±18.5       | p=0.82       |
| In smokers> 15 PY, Pack-yrs            | 81                                      | 30.0±15.                        | 30.0±11.9         | 31.0±12.9                      | 28.7±20.5       | p=0.77       |
| <b>BMI, kg/m<sup>2</sup></b>           | 448                                     | 23.9±3.5                        | 23.6±3.4          | 24.4±3.6                       | 23.8±3.6        | 0.64         |
| <25 kg/m <sup>2</sup>                  | 306                                     | 68.3                            | 75.0              | 61.2                           | 68.6            | 0.09         |
| [25-30[ kg/m <sup>2</sup>              | 116                                     | 25.9                            | 22.3              | 30.6                           | 24.8            |              |
| ≥30 kg/m <sup>2</sup>                  | 26                                      | 5.8                             | 2.7               | 8.2                            | 6.5             |              |
| <b>Physical activity</b>               |                                         |                                 |                   |                                |                 |              |
| None                                   | 154                                     | 34.5                            | 27.7              | 42.5                           | 33.5            | 0.29         |
| 1/2 hour per week                      | 61                                      | 13.7                            | 15.5              | 11.6                           | 13.8            |              |
| 1 hour per week                        | 86                                      | 19.3                            | 21.6              | 17.1                           | 19.1            |              |
| >1 hour per week                       | 145                                     | 32.5                            | 35.1              | 28.8                           | 33.6            |              |
| <b>Respiratory symptoms in last 12</b> |                                         |                                 |                   |                                |                 |              |
| Wheeze                                 | 83                                      | 18.5                            | 17.6              | 14.3                           | 23.5            | 0.18         |
| Night chest tightness                  | 79                                      | 17.6                            | 19.6              | 17.6                           | 15.7            | 0.37         |
| Attack of shortness of breath          | 32                                      | 7.2                             | 6.8               | 6.1                            | 8.5             | 0.54         |
| Woken by shortness of breath           | 30                                      | 6.7                             | 10.1              | 2.7                            | 7.2             | 0.32         |
| <b>Chronic cough or phlegm</b>         | 30                                      | 6.7                             | 5.4               | 7.5                            | 7.2             | 0.54         |
| <b>Asthma ever in life</b>             | 70                                      | 15.6                            | 18.9              | 12.2                           | 15.7            | 0.45         |
| <b>Current Asthma</b>                  | 34                                      | 7.6                             | 9.5               | 5.4                            | 8.0             | 0.63         |
| <b>Self-reported comorbidities</b>     |                                         |                                 |                   |                                |                 |              |
| No comorbidity                         | 250                                     | 56.2                            | 54.4              | 53.7                           | 60.3            | 0.31         |
| Depression                             | 25                                      | 5.6                             | 8.9               | 2.7                            | 5.3             | 0.18         |
| Diabetes                               | 6                                       | 1.4                             | 1.4               | 1.4                            | 1.3             | 0.98         |
| Migraine/recurrent headaches           | 83                                      | 18.8                            | 21.1              | 18.1                           | 17.3            | 0.41         |
| Cancer                                 | 4                                       | 0.9                             | 1.4               | 0                              | 1.3             | 0.99         |
| Cardiovascular diseases                | 46                                      | 10.4                            | 12.9              | 11.0                           | 7.4             | 0.12         |
| <b>Atopy</b>                           | 132                                     | 30.1                            | 27.6              | 33.6                           | 29.3            | 0.75         |



**Table E1 (continued)**

| <b>Characteristics at follow-up*</b>                                       | n   | % or<br>mean±sd | % or<br>mean±sd | % or<br>mean±sd | % or<br>mean±sd | p for<br>trend† |
|----------------------------------------------------------------------------|-----|-----------------|-----------------|-----------------|-----------------|-----------------|
| <b>Mean Age, years</b>                                                     | 448 | 56.6±6.8        | 58.6±6.0        | 56.3±7.1        | 55.0±6.7        | <0.0001         |
| <b>Change in pack-years between<br/>baseline and follow-up (ECRHS III)</b> | 439 | 1.6±3.8         | 1.5±3.6         | 1.6±3.6         | 1.5±4.2         | 0.96            |
| <b>Cumulative total pack-years at</b>                                      |     |                 |                 |                 |                 |                 |
| - <b>In all participants at ECRHS III</b>                                  | 439 | 12.3±17.        | 13.2±16.8       | 11.4±16.1       | 12.2±19.1       | 0.63            |
| - <b>In Ex+Smokers at ECRHS III</b>                                        | 275 | 19.6±18.        | 19.3±17.2       | 20.2±16.8       | 19.4±21.0       | 0.97            |
| - <b>In Smokers&gt;15PY at ECRHS III</b>                                   | 76  | 36.1±19.        | 36.9±16.0       | 35.8±15.6       | 36.0±26.4       | 0.87            |
| <b>Change in BMI between baseline<br/>and follow-up (ECRHS III)</b>        | 447 | 1.7±2.2         | 1.8±2.0         | 1.8±2.4         | 1.5±2.1         | 0.25            |

\* Characteristics of the sample of participants with telomere length assessed at baseline and lung function data available at baseline and follow-up. Smoking status at baseline defined according to current status and cumulative pack years of smoking at ECRHS II. Smoking status at follow-up defined according to current status and cumulative pack years of smoking at ECRHS III. Predicted value for FEV1 and FVC and lower limit of normal (LLN) obtained from GLI reference equations. † p values are for test of trend across the tertiles, apart for centre, smoking, BMI, and physical activity, for which p values are for chi-square test.

**Online Table E2. Lung function and airflow obstruction at baseline and follow-up, and lung function decline by tertiles of telomere length at baseline\***

|                                                    |     | Tertile of telomere length at baseline |                                 |                   |                                | p for trend |
|----------------------------------------------------|-----|----------------------------------------|---------------------------------|-------------------|--------------------------------|-------------|
|                                                    |     | All<br>n=448                           | Tertile1<br>(shortest)<br>n=148 | Tertile2<br>n=147 | Tertile3<br>(longest)<br>n=153 |             |
|                                                    |     | % or<br>mean±sd                        | % or<br>mean±sd                 | % or<br>mean±sd   | % or<br>mean±sd                |             |
| <b>Lung function at baseline<br/>(ECRHS II)</b>    |     |                                        |                                 |                   |                                |             |
| FEV1% predicted                                    | 447 | 99.1±13.4                              | 98.7±13.5                       | 98.4±13.2         | 100.0±13.6                     | 0.41        |
| FVC% predicted                                     | 444 | 97.0±13.3                              | 97.3±14.0                       | 96.6±13.3         | 97.1±12.7                      | 0.90        |
| pre bronchodilator FEV <sub>1</sub> /FVC           | 18  | 4.0                                    | 5.4                             | 3.4               | 3.3                            | 0.36        |
| <b>Lung function at follow-up<br/>(ECRHS III)</b>  |     |                                        |                                 |                   |                                |             |
| FEV <sub>1</sub> % predicted                       | 448 | 94.0±14.9                              | 93.4±15.3                       | 93.8±15.2         | 94.8±14.2                      | 0.42        |
| FVC% predicted                                     | 426 | 97.6±13.7                              | 97.4±13.5                       | 97.4±14.8         | 97.9±12.9                      | 0.75        |
| pre bronchodilator FEV <sub>1</sub> /FVC           | 35  | 8.2                                    | 9.9                             | 9.3               | 5.6                            | 0.18        |
| post bronchodilator FEV <sub>1</sub> /FVC          | 17  | 4.2                                    | 5.2                             | 3.8               | 3.7                            | 0.55        |
| <b>FEV1 decline</b>                                |     |                                        |                                 |                   |                                |             |
| <b>FEV1</b> FEV <sub>1</sub> decline, uncorrected, | 448 | -43.6±27.6                             | -44.3±26.4                      | -42.3±30.1        | -44.1±25.5                     | 0.94        |
| <b>FEV1</b> FEV <sub>1</sub> decline, Gerbase,     | 448 | -38.5±27.5                             | -39.3±26.3                      | -37.3±30.8        | -39.1±25.5                     | 0.95        |
| <b>FEV1</b> FEV <sub>1</sub> decline, Bridevaux,   | 448 | -30.4±27.4                             | -                               | -29.1±30.6        | -31.0±25.4                     | 0.97        |
| FEV1% predicted decline, 10yrs                     | 447 | -4.63±8.1                              | -                               | -4.30±8.72        | -4.70±7.29                     | 0.83        |

\* FEV1 decline was defined (i) using pre-BD FEV1 at follow-up uncorrected for change in spirometer between the surveys, (ii) or using FEV1 at follow-up corrected assuming a fixed additive correction term (1) (iii) or using a correction term obtained from internally-derived spirometer-specific reference equations (2) (iv) or expressed as change in FEV1% predicted, reconstructed for a period of 10 years. Predicted value for FEV1 and FVC and lower limit of normal (LLN) were obtained from GLI reference equations. See method details in the online supplement.

**Online Table E3. Difference in annual FEV1 decline according to smoking and telomere length, obtained from the model including an interaction between smoking and telomere length.**

| Annual FEV <sub>1</sub> decline (ml/year)                   | Tertile of telomere length at baseline                                                                            |                        |                                                                    |
|-------------------------------------------------------------|-------------------------------------------------------------------------------------------------------------------|------------------------|--------------------------------------------------------------------|
|                                                             | Tertile1 (shortest)                                                                                               | Tertile2               | Tertile3 (longest)                                                 |
| Estimate for the effect of telomere length in never smokers | 4.9 (-5.0 to 14.9)                                                                                                | 3.2 (-5.9 to 12.4)     | (ref)                                                              |
|                                                             | Estimate for interaction showing the modified effect of smoking in subjects with short or medium telomere length* |                        | Estimate for the effect of smoking in subjects with long telomeres |
| Ex-smokers                                                  | -2.5 (-16.1 to 11.2)                                                                                              | 3.0 (-10.9 to 16.9)    | -6.4 (-16.1 to 3.3)                                                |
| Smokers ≤ 15 Pack-yrs                                       | <b>-21.8 (-40.6 to -3.0) †</b>                                                                                    | -11.0 (-31.8 to 9.7)   | 5.9 (-7.0 to 18.8)                                                 |
| Smokers > 15 Pack-yrs                                       | <b>-21.3 (-38.8 to -3.7) †</b>                                                                                    | -16.5 (-33.2 to 0.2) § | 1.6 (-10.7 to 14.0)                                                |

Data are regression coefficients (95%CI). All models adjusted for age, gender, centre, BMI and physical activity. Smoking status is defined according to current status and cumulative pack-years smoked at the end of follow-up. \*In this model, the difference in FEV1 decline is modelised as the sum of the estimate obtained for smoking, the estimate obtained for tertile of telomere length and the estimate of the interaction. For example, compared to non-smokers with long telomeres (reference), heavy smokers with short telomeres will have an additional loss of (1.6 +4.9 -21.3 =) -14.8 ml/yrs. † p<0.05; § p=0.06;

**Online Table E4. Difference in FEV<sub>1</sub>%predicted at follow-up in smokers as compared to never-smokers, stratified by tertiles of telomere length**

|                                                |       | Tertile of telomere length at baseline |                         |                       |
|------------------------------------------------|-------|----------------------------------------|-------------------------|-----------------------|
|                                                |       | Tertile1<br>(shortest)                 | Tertile2                | Tertile3<br>(longest) |
| <b>FEV<sub>1</sub> %predicted at follow-up</b> |       |                                        |                         |                       |
| Never smokers                                  | n=164 | (ref)                                  | (ref)                   | (ref)                 |
| Ex-smokers                                     | n=151 | -3.4 (-9.3 to 2.4)                     | -2.9 (-9.3 to 3.4)      | 1.3 (-4.2 to 6.8)     |
| Smokers ≤ 15 Pack-yrs                          | n=49  | -6.1 (-14.1 to 1.9)                    | -6.3 (-16.1 to 3.5)     | 1.8 (-5.4 to 9.0)     |
| Smokers > 15 Pack-yrs                          | n=76  | -14.9 (-22.3 to -7.4) ‡                | -10.4 (-17.1 to -3.6) ‡ | 2.3 (-4.7 to 9.3)     |
| <i>p for trend</i>                             |       | <i>0.0001</i>                          | <i>0.003</i>            | <i>0.51</i>           |

Data are regression coefficient (95%CI). All models adjusted for age, gender, centre, BMI and physical activity. Smoking status is defined according to current status and cumulative pack-years smoked at the end of follow-up.

† p<0.05 ‡ p<0.01 § p<0.10, as compared to never –smokers.

Interaction Tertile telomere\*smoking: p=0.07
